# Supplementary material
Source: PubMed Central journal article supplement (PMC3578909)
Supplement: psb-7-1676-s01.pdf [file psb-7-1676-s01.pdf]

## **Supplemental Material to:**

**Johannes Rohrmann, Ryan McQuinn, James Giovannoni,  
Alisdair R. Fernie and Takayuki Tohge**

**Tissue specificity and differential expression of  
transcription factors in tomato provide hints of unique  
regulatory networks during fruit ripening**

**Plant Signaling & Behavior 2012; Vol(Issue)  
<http://dx.doi.org/10.4161/psb.22264>**

**<http://www.landesbioscience.com/journals/psb/article/22264>**

**Table S2:** List of primers used in this study

| <b>Genes</b>     | <b>Forward Primer (5'-3')</b> | <b>Reverse Primer(5'-3')</b> |
|------------------|-------------------------------|------------------------------|
| <i>AtMed2/32</i> | GCTCACTGATACTGCGTTGG          | CTACACCAGAGCCACGTTGC         |
| <i>AtMed3</i>    | GGTTCCGAGTGTGAAGGTGT          | GTAGCTGCCTCCCTCATCTG         |
| <i>AtMed4</i>    | TGAAGCACTGATTGAGCCAC          | GGTCTCATATGTTGATGATCCTC      |
| <i>AtMed5/33</i> | CTTTCAGAAGTTGCAAGGGC          | TCCAAGCAGGAAACTCAGG          |
| <i>AtMed6</i>    | TCCGGGAACGGATATGACTG          | CAGGACCATCTCTCTTTTGC         |
| <i>AtMed7</i>    | CCTACGTCTGTTTTGGAGGC          | GTGAATAAGCGTTGCTCTCG         |
| <i>AtMed8</i>    | TAGCTTGGCCAAAGCCATTGC         | GAACACCTTGAAGCAACTGC         |
| <i>AtMed9</i>    | ACAACAACAACAGACGCAGC          | CCGGAGTTTGAACCAACTGT         |
| <i>AtMed10</i>   | CCGTCGACGATTCAAATGAG          | AACTCATCTGGGTTCTTCCCATC      |
| <i>AtMed11</i>   | TGGAAGTAGCTGGTGGAGTG          | GGATAACCGTCAGCAGTT           |
| <i>AtMed12</i>   | ACGGTCTGAATTCCCGATTAG         | TAGAAGCGAACCAGAGAGAGG        |
| <i>AtMed13</i>   | CTGGAGGATTAAGCTGCGAC          | AGCCTTTCCTTCAAGCTGGG         |
| <i>AtMed14</i>   | AGATGCAATTCGCTTCGACT          | TCCACGTCAATGCAGCTCTGG        |
| <i>AtMed15</i>   | GCCTCTGGAATGACGGGTTTC         | TCCCTGACTGGAAGTTCTGC         |
| <i>AtMed16</i>   | AACATGCCTCGCCCAAGAG           | CTCTTTCAGACATCCTGCG          |
| <i>AtMed17</i>   | GTTGAGAATTTGCAATTGGC          | CTTCCAGTTCCGCTGCAACC         |
| <i>AtMed18</i>   | ACTGCGCACATAAGTGTTTCTG        | CCATCCGACATAAGAGATGC         |
| <i>AtMed19</i>   | GGTTGGGGACACAGAGATCAG         | GCTTGTGCTTCTTATGCTCTC        |
| <i>AtMed20</i>   | GATGGGTTTCAGTATCAGCTTGG       | CATGTGAGCCATCACGAGAGC        |
| <i>AtMed21</i>   | ACCAGTCCAGCTTTCACC            | TAGCTCCTTCTCTGCAGCCTC        |
| <i>AtMed22</i>   | GGCGTTGTTGCAGAGAGTTG          | GCAATTCTAGCCAACAATCG         |
| <i>AtMed23</i>   | CGCCTTGATAATTGCAATGAGC        | GCTCCATCGCATTGTTCTCG         |

|                  |                         |                          |
|------------------|-------------------------|--------------------------|
| <i>AtMed25</i>   | AAGGGCTTGCCGAAGCATTG    | GCTCTAATTGTTGGAAGCTGC    |
| <i>AtMed28</i>   | GGACATTATGGCTTGCCTCACAG | CTTTTGTCTTAAGCTCTTCCTCC  |
| <i>AtMed31</i>   | CCGACGGTGGGAAGGCAACGA   | GCCATAGCAGTCCTGAAGTTGGGG |
| <i>AtMed34</i>   | CAGTTGGGTGACAAACTCAG    | CGTCGAGCTTGAGTTCCAACC    |
| <i>AtMed35</i>   | ATACAGCAGCAGCAGCTCTTTCC | TGGAGGGACGCCAGCTACATGCA  |
| <i>AtMed36</i>   | ATTGTGGAACCTCACAGACAG   | CATGAGAGACTGTGGTTCCAG    |
| <i>AtMed37</i>   | AGATGAAGGAGACAGCTGAAGCC | CCATTTGTGGAGAGAACCTC     |
| <i>AtCdk8</i>    | TGAATTACCCAACCTCGTCCAG  | CGATCTACTGCCCATTCATG     |
| <i>AtCycC</i>    | GATGAAGGTCTTGAAGCATTG   | TGACAAGACCCCAAGTTAGATG   |
| <i>β-Actin</i>   | TGCCAATCTACGAGGGTTC     | TCTCTTACAATTTCCCGCTCTG   |
| <i>Ubiquitin</i> | CCAAGATCCAAGACAAAGAGGG  | TGAGAACAAGATGAAGGG       |
| <i>GAPDH</i>     | ACCACTAACTGCCTTGCTC     | CACCTCTCCAGTCCTTCATTG    |
| <i>AUX2-27</i>   | AGAGTCAAGTTGTGGGTTGG    | GCAGCTCCATCTACACTCAC     |
| <i>AT-HSF</i>    | CCTTTTCTGTAACCTCCTTCC   | TTGCCCTCTAAGAAACCCTTC    |
| <i>JAZ</i>       | TTCCGAGATATTCAAGGTGCG   | GAAATCGGGATCTGAGGCTG     |
| <i>SAUR</i>      | GAGGTGCTCAAGTCTAGGAAAG  | CACGAGATTGGGACCACATAG    |
| <i>COR15A</i>    | GTGAAACCGCAGATACATTGG   | CCCTACTTTGTGGCATCCTTAG   |

Table S1: Position and orientation of *Med* genes in *Arabidopsis*

| Name            | ID        | Chromosome number | Coordinates       | Orientation |
|-----------------|-----------|-------------------|-------------------|-------------|
| <i>AtMed2</i>   | AT1G11760 | 1                 | 3972032-3973286   | -           |
| <i>AtMed3</i>   | AT3G09180 | 3                 | 2819118-2821425   | +           |
| <i>AtMed4</i>   | AT5G02850 | 5                 | 652110-653673     | +           |
| <i>AtMed5a</i>  | AT3G23590 | 3                 | 8467449-8473627   | +           |
| <i>AtMed5b</i>  | AT2G48110 | 2                 | 19673293-19679711 | +           |
| <i>AtMed6</i>   | AT3G21350 | 3                 | 7517070-7518744   | +           |
| <i>AtMed7a</i>  | AT5G03220 | 5                 | 767489-768857     | -           |
| <i>AtMed7b</i>  | AT5G03500 | 5                 | 876521-878336     | -           |
| <i>AtMed8</i>   | AT2G03070 | 2                 | 905619-909070     | +           |
| <i>AtMed9a</i>  | AT1G55080 | 1                 | 20553011-20554254 | -           |
| <i>AtMed9b</i>  | AT1G29580 | 1                 | 10338443-10339146 | +           |
| <i>AtMed10a</i> | AT5G41910 | 5                 | 16778055-16779274 | -           |
| <i>AtMed10b</i> | AT1G26665 | 1                 | 9214174-9215552   | +           |
| <i>AtMed11</i>  | AT3G01435 | 3                 | 166619-168288     | -           |
| <i>AtMed12</i>  | AT4G00450 | 4                 | 202416-211003     | +           |
| <i>AtMed13</i>  | AT1G55325 | 1                 | 20637380-20648434 | +           |
| <i>AtMed14</i>  | AT3G04740 | 3                 | 1293807-1300714   | +           |
| <i>AtMed15a</i> | AT1G15780 | 1                 | 5430183-5436412   | -           |
| <i>AtMed15b</i> | AT1G15770 | 1                 | 5426892-5428280   | -           |
| <i>AtMed15c</i> | AT1G15772 | 1                 | 5428520-5429561   | -           |
| <i>AtMed15d</i> | AT1G15790 | 1                 | 5438299-5440030   | -           |
| <i>AtMed15e</i> | AT2G10440 | 2                 | 4013752-4018046   | -           |
| <i>AtMed16</i>  | AT4G04920 | 4                 | 2497931-2505535   | +           |
| <i>AtMed17</i>  | AT5G20170 | 5                 | 6807481-6810798   | -           |
| <i>AtMed18</i>  | AT2G22370 | 2                 | 9500815-9502190   | -           |
| <i>AtMed19a</i> | AT5G12230 | 5                 | 3953148-3956185   | -           |
| <i>AtMed19b</i> | AT5G19480 | 5                 | 6571501-6573453   | +           |
| <i>AtMed20a</i> | AT2G28230 | 2                 | 12037677-12039046 | -           |
| <i>AtMed20b</i> | AT2G28020 | 2                 | 11933702-11934060 | +           |
| <i>AtMed20c</i> | AT4G09070 | 4                 | 5802308-5803392   | +           |
| <i>AtMed21a</i> | AT4G04780 | 4                 | 2432309-2433550   | +           |
| <i>AtMed21b</i> | AT1G33450 | 1                 | 12139228-12139780 | +           |
| <i>AtMed22a</i> | AT1G16430 | 1                 | 5614619-5615510   | +           |
| <i>AtMed22b</i> | AT1G07950 | 1                 | 2465770-2467022   | -           |
| <i>AtMed23</i>  | AT1G23230 | 1                 | 8244440-8251741   | +           |
| <i>AtMed25</i>  | AT1G25540 | 1                 | 8969065-8974660   | -           |

|                 |           |   |                   |   |
|-----------------|-----------|---|-------------------|---|
| <i>AtMed28</i>  | AT3G52860 | 3 | 19591848-19592767 | - |
| <i>AtMed31</i>  | AT5G19910 | 5 | 6731236-6732990   | - |
| <i>AtMed34</i>  | AT1G31360 | 1 | 11232333-11237530 | + |
| <i>AtMed35</i>  | AT1G44910 | 1 | 16975604-16982965 | + |
| <i>AtMed36</i>  | AT4G25630 | 4 | 13074133-13076429 | + |
| <i>AtMed37a</i> | AT5G28540 | 5 | 10540460-10543375 | - |
| <i>AtMed37b</i> | AT5G42020 | 5 | 16807483-16810646 | - |
| <i>AtMed37c</i> | AT1G09080 | 1 | 2929217-2931841   | - |
| <i>AtCdk8</i>   | AT5G63610 | 5 | 25463437-25465897 | - |
| <i>AtCycCa</i>  | AT5G48630 | 5 | 19721503-19723168 | - |
| <i>AtCycC b</i> | AT5G48640 | 5 | 19723533-19725689 | - |
